# Supplementary material for: Towards the mechanism of electrochemical activity and self-healing of 1 wt% PTSA doped polyaniline in alkyd composite polymer coating: combined AFM-based studies
Source: Royal Society of Chemistry journal article supplement (doi:10.1039/c6ra00661b), 2016-01-01
Supplement: c6ra00661b1.pdf [file c6ra00661b1.pdf]

Supplementary information

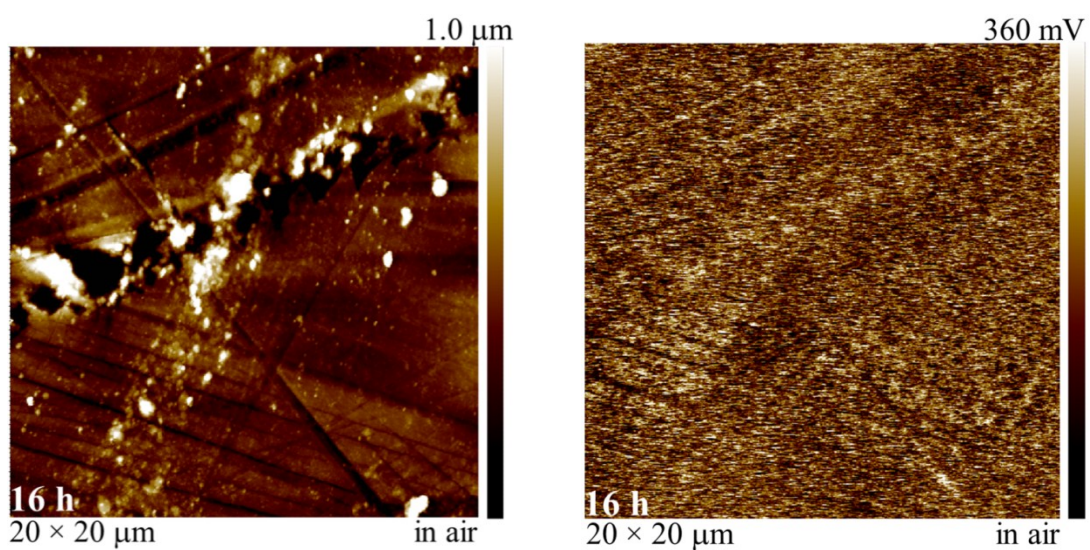

Figure 1. Topography and Volta potential KFM images of the same surface area of the reference coating after 16 h in air.
